# Supplementary material for: Enhanced Delivery of Thermoresponsive Polymer-Based Medicine into Tumors by Using Heat Produced from Gold Nanorods Irradiated with Near-Infrared Light
Source: MDPI journal article supplement (doi:10.3390/cancers13195005), 2021-10-06
Supplement: s1 [file s1]

## Supplementary Materials

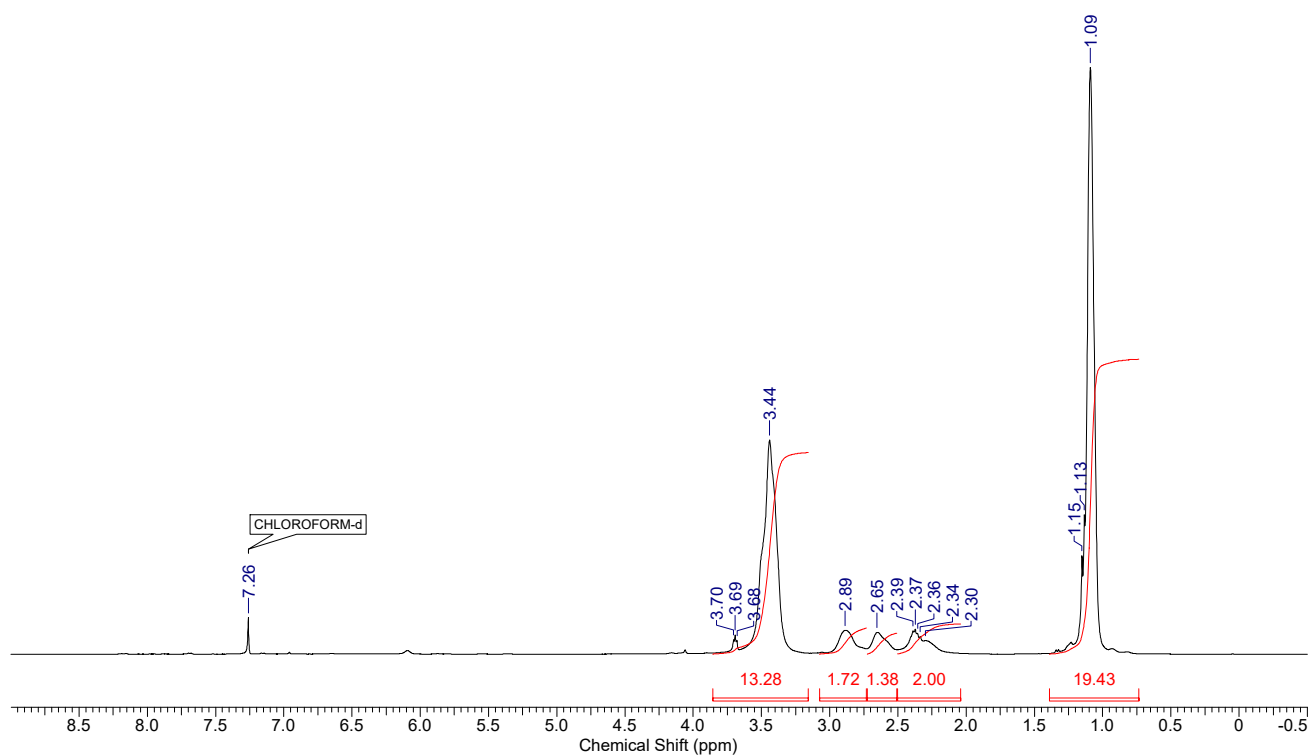

Figure S1.  $^1\text{H}$  NMR spectrum of a POZ derivative investigated in this study.

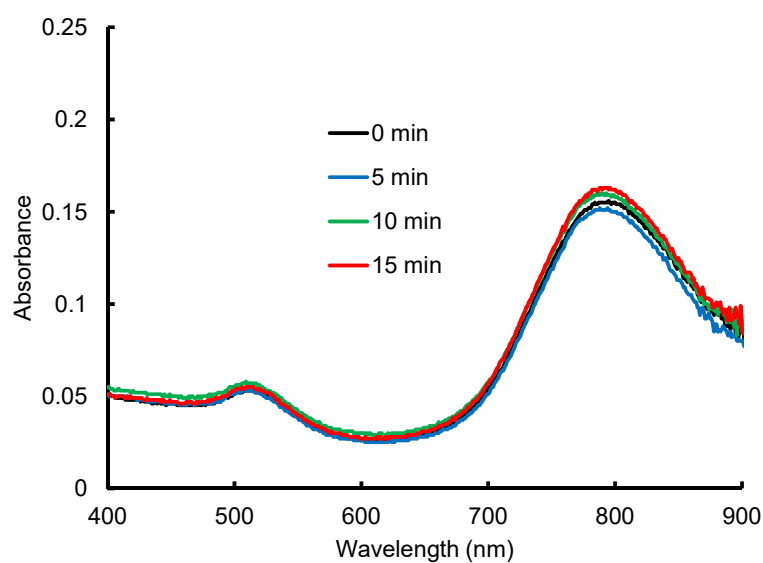

Figure S2. Vis-NIR spectra of GNR investigated in this study. At 0, 5, 10, and 15 min after irradiation of NIR light ( $0.6 \text{ W/cm}^2$ ), the Vis-NIR spectra was evaluated.

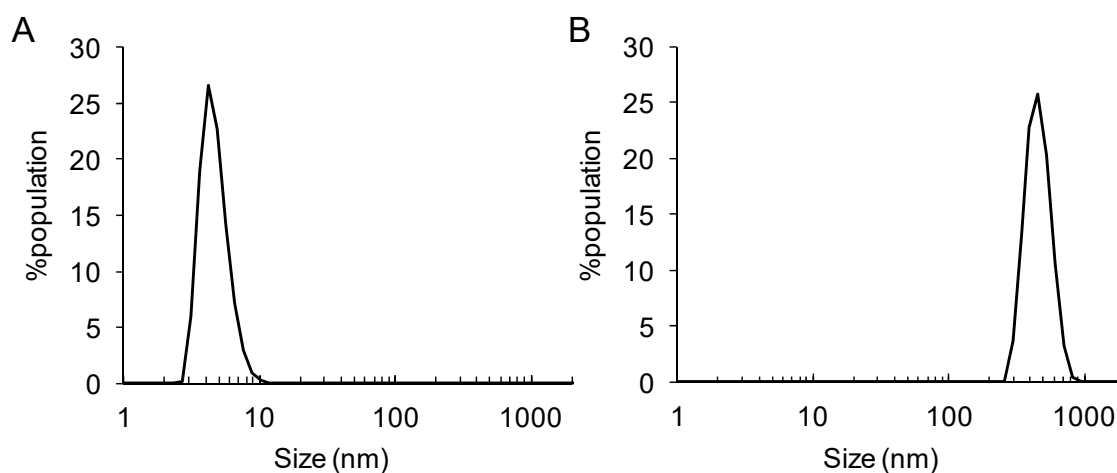

**Figure S3.** Size distribution of POZ derivative investigated in this study in PBS at 37 °C (A) and 42 °C (B), determined using dynamic light scattering measurements. The number-average diameters were shown.

**Movie S1.** Polyoxazoline (POZ) distribution in tumor tissues treated with gold nanorod (GNR) administration and near-infrared (NIR) light irradiation was observed in real-time. Confocal fluorescence microscopy imaging was performed 60 min after probe injection. Green: FITC-labeled POZ. Scale bar=50  $\mu$ m.

**Movie S2.** Polyoxazoline (POZ) distribution in untreated normal tissues (back) observed in real-time. Confocal fluorescence microscopy imaging was performed 60 min after probe injection. Green: FITC-labeled POZ. Scale bar=50  $\mu$ m.
